# Supplementary material
Source: publisher figshare collection journal article supplement (https://scielo.figshare.com/articles/dataset/_/9276518)
Supplement: Supplementary file 1 [file Table_1.xls]

## Sheet: Table_1
<b>Parameter</b>	<b>Conventional anchorage</b>			<b>Mini-implant anchorage</b>			<b>P value (difference of both groups)</b>
	T<sub>1</sub> (mean+SD)	T<sub>2</sub> (mean+SD)	T<sub>2</sub>-T<sub>1</sub>	P value	T<sub>1</sub> (mean+SD)	T<sub>2</sub> (mean+SD)	T<sub>2</sub>-T<sub>1</sub>	P value
Mesiodistal angulation	76.4 Â± 6.96	86.2 Â± 7.46	9.8 Â± 0.5	0.000	79.6 Â± 7.89	88.13 Â± 5.76	8.53 Â± 2.13	0.000	0.499
Buccolingual inclination of canine	97.6 Â± 6.18	98.95 Â± 5.34	1.35 Â± 0.84	0.086	100.27 Â± 4.3	99.9 Â± 4.78	-0.37 Â± 0.48	0.694	0.004
Buccolingual inclination of 1<sup>st</sup> premolar	91.21 Â± 3.97	95.45 Â± 3.18	4.24 Â± 0.79	0.000	91.63 Â± 4.44	92.41 Â± 4.46	0.78 Â± 0.02	0.259	0.003
Buccolingual inclination of 2<sup>nd</sup> premolar	85.04 Â± 3.92	88.17 Â± 4.48	3.13 Â± 0.56	0.002	82.95 Â± 3.64	83.54 Â± 3.03	0.59 Â± 0.61	0.435	0.029
Buccolingual inclination of 2<sup>nd</sup> molar	67.45 Â± 5.42	72.01 Â± 5.92	4.56 Â± 0.5	0.022	65.82 Â± 4.09	65.69 Â± 4.75	-0.13 Â± 0.66	0.935	0.000
Extrusion of molar in the vertical plane	12.56 Â± 1.63	12.160 Â± 1.8	-0.4 Â± 0.17	0.038	9.77 Â± 1.76	9.74 Â± 1.79	-0.03 Â± 0.03	0.193	0.008
Bone density in HU at the mesial alveolar crest	745.80 Â± 328.722	1105.30 Â± 459.75	359.5 Â± 131.032	0.018	988.90 Â± 529.46	1208.20 Â± 459.873	219.3 Â± 69.59	0.027	0.623
