# Supplementary material
Source: publisher figshare collection journal article supplement (https://scielo.figshare.com/articles/dataset/_/9276518)
Supplement: Supplementary file 2 [file Table_2.xls]

## Sheet: Table_2
<b>Group</b>	<b>Mesial root movement T<sub>1</sub></b>	<b>Mesial root movement T<sub>2</sub></b>	<b>Mean difference for mesial root movement</b>	<b>Distal crown tipping T<sub>1</sub></b>	<b>Distal crown tipping T<sub>2</sub></b>	<b>Mean difference for distal crown tipping</b>	<b>P value</b>
MIA group	20.77	20.13	0.64	28.34	28.2	0.14	0.041
CA group	19.96	19.72	0.24	27.1	26.07	1.03	0.019
