# Supplementary material
Source: publisher figshare collection journal article supplement (https://scielo.figshare.com/articles/dataset/_/9276518)
Supplement: Supplementary file 3 [file Table_3.xls]

## Sheet: Table_3
<b>Parameter</b>	<b>CA Group</b>	<b>MIA Group</b>
Mesiodistal angulation of second molar	o.6	0.4
Buccolingual inclination of canine	0.6	0.5
Buccolingual inclination of first premolar	0.5	0.4
Buccolingual inclination of second premolar	0.6	0.5
Buccolingual inclination of second molar	0.7	0.6
Extrusion of molar in the vertical plane	0.3	0.3
